# Supplementary material
Source: ML conference proceedings conference paper supplement (https://proceedings.neurips.cc/paper_files/paper/2019/hash/02bf86214e264535e3412283e817deaa-Abstract.html)
Supplement: Supplementary file [file 02bf86214e264535e3412283e817deaa-Supplemental.zip]

---

# Supplementary Material: Lower Bounds on Adversarial Robustness from Optimal Transport

---

**Arjun Nitin Bhagoji**

Department of Electrical Engineering  
Princeton University  
abhagoji@princeton.edu

**Daniel Cullina**

Department of Electrical Engineering  
Pennsylvania State University  
cullina@psu.edu

**Prateek Mittal**

Department of Electrical Engineering  
Princeton University  
pmittal@princeton.edu

## A Proof of Theorem 1

First, we present an easy lemma that uses our topological conditions on the neighborhood function.

**Definition 1.** A binary relation  $R \subset \mathcal{X} \times \mathcal{Y}$ , or equivalently a set-valued function  $\mathcal{X} \rightarrow 2^{\mathcal{Y}}$ , is upper hemicontinuous if it has the following property. For all open sets  $V \subseteq \mathcal{Y}$  and points  $x \in \mathcal{X}$  such that  $R(x) \subseteq V$ ,  $x$  has an open neighborhood  $U$  such that  $R(U) \subseteq V$ . Equivalently,  $R^T(\mathcal{Y} \setminus V)$  is closed.

**Lemma 1.** Suppose that the adversarial constraint function  $N$  is upper hemicontinuous, and  $N(x)$  is nonempty and closed for all  $x \in \mathcal{X}$ . Then the cost function  $c_N \circ c_N^T$  is lower semicontinuous.

*Proof.* For each point  $(x, x')$  such that  $(c_N \circ c_N^T)(x, x') = 1$ , we will find an open neighborhood with the same cost. Thus  $c_N \circ c_N^T$  is the indicator function of an open set and is lower semicontinuous.

The sets  $N(x)$  and  $N(x')$  must be disjoint because  $(c_N \circ c_N^T)(x, x') = 1$ . They are closed, and  $\mathcal{X}'$  is a normal space, so they have disjoint open neighborhoods  $V$  and  $V'$ . Because  $N$  is upper hemicontinuous,  $x$  and  $x'$  have open neighborhoods  $U$  and  $U'$  such that  $R(U) \subseteq V$  and  $R(U') \subseteq V'$ . Because  $V$  and  $V'$  are disjoint,  $c_N \circ c_N^T$  is one everywhere in  $U \times U'$ .  $\square$

For the proof of Theorem 1 we need to use the concept of a cyclically monotone set [1].

**Definition 2.** A subset  $\Gamma \subseteq \mathcal{X} \times \mathcal{Y}$  is said to be  $c$ -cyclically monotone if, for all  $n \in \mathbb{N}$  and all families of points  $(x, y) \in \Gamma^n \subseteq \mathcal{X}^n \times \mathcal{Y}^n$ ,

$$\sum_{i=0}^{n-1} c(x_i, y_i) \leq \sum_{i=0}^{n-1} c(x_i, y_{i+1})$$

(with the convention  $y_n = y_0$ ).

*Proof of Theorem 1.* Abbreviate  $c_N \circ c_N^T$  as  $c$ . From Lemma 1, the cost function  $c$  is lower-semicontinuous. From Theorem 5.10 (ii), there is a set  $\Gamma \subseteq \mathcal{X} \times \mathcal{X}$  that is measurable, is  $c$ -cyclically monotone, and such that every optimal coupling is concentrated on it.

We need to find  $f, g : \mathcal{X} \rightarrow \mathbb{R}$  such that  $c(x, y) \geq g(y) - f(x)$  everywhere and  $c(x, y) \leq g(y) - f(x)$  for  $(x, y) \in \Gamma$ . The former property means that  $f$  and  $g$  are admissible potentials and the latter means that they are optimal in the dual transportation problem. A classifier  $h$  can be constructed from any pair of admissible  $\{0, 1\}$ -valued potentials.

For all  $i \geq 0$ , let

$$\begin{aligned} A_0 &= \{x \in \mathcal{X} : \exists y' \in \mathcal{X} \text{ s.t. } c(x, y') = 1, (x, y') \in \Gamma\} \\ A'_{i+1} &= \{y' \in \mathcal{X} : \exists x \in A_i \text{ s.t. } c(x, y') = 0\} \\ A_{i+1} &= \{x \in \mathcal{X} : \exists y' \in A'_{i+1} \text{ s.t. } c(x, y') = 0, (x, y') \in \Gamma\} \\ B_0 &= \{y \in \mathcal{X} : \exists x' \in \mathcal{X} \text{ s.t. } c(x', y) = 1, (x', y) \in \Gamma\} \\ B'_{i+1} &= \{x' \in \mathcal{X} : \exists y \in B_i \text{ s.t. } c(x', y) = 0\} \\ B_{i+1} &= \{y \in \mathcal{X} : \exists x' \in B'_{i+1} \text{ s.t. } c(x', y) = 0, (x', y) \in \Gamma\} \end{aligned}$$

Further define  $A = \cup_{i \geq 0} A_i$ ,  $A' = \cup_{i \geq 1} A'_i$ ,  $B = \cup_{i \geq 0} B_i$ , and  $B' = \cup_{i \geq 1} B'_i$ . Observe that  $A' = \{y \in \mathcal{X} : \exists x \in A \text{ s.t. } c(x, y) = 0\}$  and  $B' = \{x \in \mathcal{X} : \exists y \in B \text{ s.t. } c(x, y) = 0\}$ . If we let  $g(y) = \mathbb{1}(B)$ , then  $f(x) = \mathbb{1}(B') = \sup_y g(y) - c(x, y)$ , i.e. the largest function such that  $g(y) - f(x) \leq c(x, y)$  everywhere. Alternative choices for  $f$  and  $g$  come from  $A$  and  $A'$ . If we let  $f(x) = 1 - \mathbb{1}(A)$ , then  $g(y) = 1 - \mathbb{1}(A') = \inf_x f(x) + c(x, y)$ .

For all  $x \in A$ , there is some  $j$  and sequences  $(x_0, \dots, x_{j-1})$  and  $(y'_0, \dots, y'_{j-1})$  such that  $x_{j-1} = x$ ,  $x_i \in A_i$ , and  $y'_{i+1} \in A'_{i+1}$  that witness this. Similarly, for all  $y \in B$ , there is some  $k$  and sequences  $(x'_0, \dots, x'_{k-1})$  and  $(y_0, \dots, y_{k-1})$  such that  $y_{k-1} = y$ ,  $y_i \in B_i$ , and  $x'_i \in B'_i$ . Now we have

$$\sum_{i=0}^{j-1} c(x_i, y'_i) + \sum_{i=0}^{k-1} c(x'_i, y_i) = 2$$

and

$$\sum_{i=1}^{j-1} c(x_{i-1}, y'_i) + \sum_{i=1}^{k-1} c(x'_{i-1}, y_i) + c(x'_0, y'_0) + c(x_{j-1}, y_{k-1}) = c(x'_0, y'_0) + c(x_{j-1}, y_{k-1}).$$

From the cyclic monotonicity of  $\Gamma$  and the fact that  $c$  is always at most 1,  $c(x'_0, y'_0) = c(x_{j-1}, y_{k-1}) = 1$ . Thus  $c(x, y) = 1$  for all  $(x, y) \in A \times B$ . This means that  $A$  and  $B'$  are disjoint and  $B$  and  $A'$  are disjoint.

Now consider some  $(x, y) \in \Gamma$ . If  $c(x, y) = 1$ , then  $x \in A_0$ ,  $y \in B_0$ , so  $(x, y) \in A \times B$ . If  $c(x, y) = 0$ ,  $(x, y)$  is in one of  $A \times A'$ ,  $B' \times B$ , or  $(\mathcal{X} \setminus A \setminus B') \times (\mathcal{X} \setminus A' \setminus B)$ . We can now easily check that for  $g(y) = \mathbb{1}(B)$  and  $f(x) = \mathbb{1}(B')$ ,  $g(y) - f(x) = c(x, y)$  everywhere in  $\Gamma$ . The choices  $g(y) = \mathbb{1}(\mathcal{X} \setminus A')$  and  $f(x) = \mathbb{1}(\mathcal{X} \setminus A)$  work similarly.

Finally, we have

$$\begin{aligned} &\mathbb{E}[g(X_{-1}) - f(X_1)] \\ &= \Pr[\tilde{h}(X_{-1}) = -1] - \Pr[\tilde{h}(X_1) \neq 1] \\ &= 1 - \Pr[\tilde{h}(X_1) \neq 1] - \Pr[\tilde{h}(X_{-1}) \neq -1] \\ &= 1 - \Pr[h(\tilde{X}_1) \neq 1] - \Pr[h(\tilde{X}_{-1}) \neq -1] \\ &= 1 - 2L(N, h, P). \end{aligned}$$

□

## B Full Proof of Theorem 2

For a closed convex ball  $\mathcal{B} \subseteq \mathbb{R}^d$ , define the cone  $\mathcal{C}_{\mathcal{B}} \subseteq \mathbb{R}^{d+1}$ ,  $\mathcal{C}_{\mathcal{B}} = \{(z, \alpha) : \alpha \geq 0, z \in \alpha \mathcal{B}\}$ . Observe that  $\mathcal{C}_{\mathcal{B}}$  is convex and for  $c \geq 0$ ,  $(z, \alpha) \in \mathcal{C}_{\mathcal{B}}$  implies  $(cz, c\alpha) \in \mathcal{C}_{\mathcal{B}}$ . Thus  $\mathcal{C}_{\mathcal{B}}$  is indeed a cone. From this, define the norm  $\|z\|_{\mathcal{B}} = \min\{\alpha : (z, \alpha) \in \mathcal{C}_{\mathcal{B}}\}$ . Thus  $\mathcal{C}_{\mathcal{B}} = \{(z, \alpha) : \|z\|_{\mathcal{B}} \leq \alpha\}$ .

For a cone  $\mathcal{C} \subseteq \mathbb{R}^d$ , the definition of the dual cone is  $\mathcal{C}^* = \{y \in \mathbb{R}^d : y^\top x \geq 0 \ \forall x \in \mathcal{C}\}$ . A pair  $(w, \gamma) \in \mathcal{C}_{\mathcal{B}}^*$  if and only if  $w^\top z + \alpha \gamma \geq 0$  for all  $(z, \alpha) \in \mathcal{C}_{\mathcal{B}}$ . It is enough to check the pairs  $(z, \|z\|_{\mathcal{B}})$ , which gives the condition  $-w^\top z \leq \|z\|_{\mathcal{B}} \gamma$ .

This is very close to the ordinary definition of the dual norm. However, when  $\mathcal{B}$  is not symmetric, the minus sign matters. If  $\mathbf{0} \in \mathcal{B}$ , then  $(\mathbf{0}, 1) \in \mathcal{C}_{\mathcal{B}}$  and the constraint  $\gamma \geq 0$  applies to  $\mathcal{C}_{\mathcal{B}}^*$ . However, if  $\mathbf{0} \notin \mathcal{B}$ ,  $\mathcal{C}_{\mathcal{B}}^*$  with contain points with negative  $\gamma$  components. In this case, there is no interpretation as a norm.

### B.1 Proof of Lemma 1

Consider the following convex program:

$$\begin{aligned} (z, \alpha, y, \beta) &\in \mathbb{R}^{d+1+d+1} \\ \min & a\alpha + b\beta \\ (z, \alpha, y, \beta) &\in \mathcal{C}_{\mathcal{B}} \times \mathcal{C}_{\Sigma} \\ z + y &= \mu \end{aligned}$$

The cone constraint is equivalent to  $\|z\|_{\mathcal{B}} \leq \alpha$  and  $\|y\|_{\Sigma} \leq \beta$ . The equality condition is equivalent to  $\mu - z - y \in \{\mathbf{0}\}$ , the trivial cone.

The Lagrangian is

$$\begin{aligned} L &= a\alpha + b\beta - w^{\top}(z + y - \mu) \\ &= (\mathbf{0}^{\top} \quad a \quad \mathbf{0}^{\top} \quad b) \begin{pmatrix} z \\ \alpha \\ y \\ \beta \end{pmatrix} - w^{\top} (I \quad \mathbf{0} \quad I \quad \mathbf{0}) \begin{pmatrix} z \\ \alpha \\ y \\ \beta \end{pmatrix} + w^{\top} \mu \end{aligned}$$

The dual is

$$\begin{aligned} w &\in \mathbb{R}^d \\ \max & \mu^{\top} w \\ (-w, a, -w, b) &\in \mathcal{C}_{\mathcal{B}}^* \times \mathcal{C}_{\Sigma}^* \end{aligned}$$

The cone constraint on  $w$  is trivial because the dual of  $\{\mathbf{0}\}$  is all of  $\mathbb{R}^d$ .

If we change the objective of the first program to use a hard constraint on  $\alpha$  instead of including it in the objective, the new primal is

$$\begin{aligned} (z, \alpha, y, \beta) &\in \mathbb{R}^{d+1+d+1} \\ \min & b\beta \\ (z, \alpha, y, \beta) &\in \mathcal{C}_{\mathcal{B}} \times \mathcal{C}_{\Sigma} \\ z + y &= \mu \\ \alpha &\leq \alpha' \end{aligned}$$

the new Lagrangian is

$$L = b\beta - w^{\top}(z + y - \mu) - \eta(\alpha' - \alpha).$$

The new dual is

$$\begin{aligned} (w, \eta) &\in \mathbb{R}^{d+1} \\ \max & \mu^{\top} w - \alpha' \eta \\ \eta &\geq 0 \\ (-w, \eta, -w, b) &\in \mathcal{C}_{\mathcal{B}}^* \times \mathcal{C}_{\Sigma}^*. \end{aligned}$$

Rewriting without any cone notation, combining  $\alpha$  with  $\alpha'$ , and specializing to  $b = 1$ , we have

$$\begin{aligned} (z, y, \beta) &\in \mathbb{R}^{d+d+1} \\ \min & \beta \\ \|z\|_{\mathcal{B}} &\leq \alpha \\ \|y\|_{\Sigma} &\leq \beta \\ z + y &= \mu \end{aligned}$$

and

$$\begin{aligned}
(w, \eta) &\in \mathbb{R}^{d+1} \\
\max \mu^T w - \alpha \eta \\
\eta &\geq 0 \\
\| -w \|_{\mathcal{B}}^* &\leq \eta \\
\| -w \|_{\Sigma}^* &\leq 1
\end{aligned}$$

From complementary slackness we have  $-w^T z + \eta \alpha = 0$  and  $-w^T y + b \beta = 0$ . From the constraints, we have  $\|z\|_{\mathcal{B}} \leq \alpha$ ,  $\|y\|_{\mathcal{B}} \leq \beta$ ,  $\| -w \|_{\mathcal{B}}^* \leq \eta$ , and  $\| -w \|_{\Sigma}^* \leq b$ . We have  $w^T z \leq \|w\|_{\mathcal{B}}^* \|z\|_{\mathcal{B}}$  and  $w^T y \leq \|w\|_{\Sigma}^* \|y\|_{\Sigma}$ . Combining these, all six inequalities are actually equalities.

## B.2 Simplification of transportation problem

From Theorem 1,

$$C_N \circ C_N^T(P_{X_1}, P_{X_{-1}}) \leq \inf_{z \in \beta \mathcal{B}} C_{TV}(\tilde{P}_{X_1}, \tilde{P}_{X_{-1}}), \quad (1)$$

$$= \inf_{z \in \beta \mathcal{B}} \sup_A \tilde{P}_{X_1}(A) - \tilde{P}_{X_{-1}}(A), \quad (2)$$

$$= \inf_{z \in \beta \mathcal{B}} \sup_w \mathbb{E}_{x \sim \mathcal{N}(\mu - z, \Sigma)} [\mathbf{1}(w^T x > 0)] - \mathbb{E}_{x \sim \mathcal{N}(-\mu + z, \Sigma)} [\mathbf{1}(w^T x > 0)] \quad (3)$$

$$= \inf_{z \in \beta \mathcal{B}} \sup_w Q\left(\frac{w^T z - w^T \mu}{\sqrt{w^T \Sigma w}}\right) - Q\left(\frac{w^T \mu - w^T z}{\sqrt{w^T \Sigma w}}\right), \quad (4)$$

$$= \inf_{z \in \beta \mathcal{B}} \sup_w 2Q\left(\frac{w^T z - w^T \mu}{\sqrt{w^T \Sigma w}}\right) - 1. \quad (5)$$

As before, since the  $Q$ -function decreases monotonically, its supremum is obtained by finding  $\inf_w \frac{w^T z - w^T \mu}{\sqrt{w^T \Sigma w}}$ . The infimum is attained at  $w^* = 2\Sigma^{-1}(z - \mu)$  and its value is  $\sqrt{(z - \mu)^T \Sigma^{-1}(z - \mu)}$ , which implies that

$$C_N \circ C_N^T(P_{X_1}, P_{X_{-1}}) \leq \inf_{z \in \beta \mathcal{B}} 2Q\left(\sqrt{(z - \mu)^T \Sigma^{-1}(z - \mu)}\right) - 1. \quad (6)$$

## B.3 Connection to the classification problem

We consider the linear classification function  $f_w(x) = \text{sgn}(w^T x)$ .

**Classification accuracy:** We define the classification problem with respect to the classification accuracy  $\mathbb{E}_{(x,y) \sim P} [\mathbf{1}(f_w(x) = y)] = \mathbb{P}_{(x,y) \sim P} [f_w(x) = y]$ , which also equals the standard 0 - 1 loss subtracted from 1. The aim of the learner is to maximize the classification accuracy, i.e. the classification problem is to find  $w^*$  which is the solution of  $\max_w \mathbb{P}_{(x,y) \sim P} [f_w(x) = y]$ .

**Performance with adversary:** In the presence of an adversary, the classification problem becomes

$$\begin{aligned}
&\max_w \mathbb{P}_{(x,y) \sim P} [f_w(x + h(x, y, w)) = y] \\
&= \max_w \frac{1}{2} \mathbb{P}_{x \sim \mathcal{N}(\mu, \Sigma)} [f_w(x + h(x, 1, w)) = 1] + \frac{1}{2} \mathbb{P}_{x \sim \mathcal{N}(-\mu, \Sigma)} [f_w(x + h(x, -1, w)) = -1].
\end{aligned}$$

We will focus on the case with  $y = 1$  for ease of exposition since the analysis is identical. The correct classification event is then

$$\begin{aligned}
&f_w(x + h(x, 1, w)) = 1, \\
&\Rightarrow w^T(x + h(x, 1, w)) > 0, \\
&\Rightarrow w^T x - w^T \arg\max_{z \in \beta \mathcal{B}} w^T z > 0, \\
&\Rightarrow w^T x - \max_{z \in \beta \mathcal{B}} w^T z > 0 \\
&\Rightarrow w^T x - \beta \|w\|_* > 0,
\end{aligned}$$

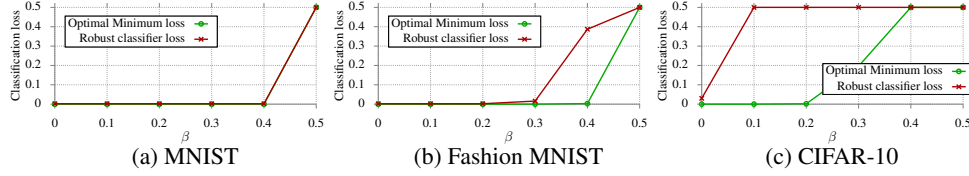

Figure 1: Variation in minimum 0 – 1 loss (adversarial robustness) as  $\beta$  is varied for ‘3 vs. 7’. For MNIST and Fashion-MNIST, the loss of a robustly classifier (trained with iterative adversarial training) is also shown for a PGD adversary with an  $\ell_\infty$  constraint.

where  $\|\cdot\|_*$  is the dual norm for the norm associated with  $\mathcal{B}$ . This gives us the classification accuracy for the case with  $y = 1$  as  $\max_w \mathbb{E}_{x \sim \mathcal{N}(\mu, \Sigma)} [\mathbf{1}(w^\top x - \beta \|w\|_* > 0)]$ . We now perform a few changes of variables to obtain an expression in terms of the standard normal distribution. For the first, we do  $x' = x - \mu$ , which gives us  $\max_w \mathbb{E}_{x' \sim \mathcal{N}(0, \Sigma)} [\mathbf{1}(w^\top x' + w^\top \mu - \beta \|w\|_* > 0)]$ . The second is  $x'' = w^\top x'$ , which results in  $\max_w \mathbb{E}_{x'' \sim \mathcal{N}(0, \sigma^2)} [\mathbf{1}(x'' + w^\top \mu - \beta \|w\|_* > 0)]$ , where  $\sigma = \sqrt{w^\top \Sigma w}$ . Finally, we set  $x''' = \frac{x''}{\sigma}$ , leading to  $\max_w \mathbb{E}_{x''' \sim \mathcal{N}(0, 1)} [\mathbf{1}(x''' + \frac{w^\top \mu}{\sigma} - \frac{\beta \|w\|_*}{\sigma} > 0)]$ .

The classification problem is then

$$\max_w \frac{1}{2} \mathbb{P}_{x \sim \mathcal{N}(\mu, \Sigma)} [f_w(x + h(x, 1, w)) = 1] + \frac{1}{2} \mathbb{P}_{x \sim \mathcal{N}(-\mu, \Sigma)} [f_w(x + h(x, -1, w)) = -1], \quad (7)$$

$$= \max_w Q\left(\frac{\beta \|w\|_* - w^\top \mu}{\sqrt{w^\top \Sigma w}}\right). \quad (8)$$

Since  $Q(\cdot)$  is a monotonically decreasing function, it achieves its maximum at  $w^* = \min_w \frac{\beta \|w\|_* - w^\top \mu}{\sqrt{w^\top \Sigma w}}$ . This is the dual problem to the one described in the previous section.

### C Proof of Theorem 3

The proof of Theorem 3 is below. The assumptions and setup are in Section 5 of the main paper.

*Proof.* Let  $\hat{\mu} = \mathbb{E}[\mu | ((X_1, Y_1), \dots, (X_n, Y_n))]$ . A straightforward computation using Bayes rule shows that  $X_{n+1} \cdot Y_{n+1} | ((X_1, Y_1), \dots, (X_n, Y_n)) \sim \mathcal{N}(\hat{\mu}, I)$ . Thus after observing  $n$  examples, the learner is faced with a hypothesis testing problem between two Gaussian distributions with known parameters. From Theorem 2, the optimal loss for this problem is  $Q(\alpha^*(\beta, \hat{\mu}))$ .

Furthermore,  $\hat{\mu} = \frac{1}{m+n} \sum_{i=1}^n X_i$  and  $\hat{\mu} \sim \mathcal{N}(0, \frac{n}{m(m+n)} I)$ . Averaging over the training examples, we see that the expected loss is

$$\mathbb{E}[Q(\alpha^*(\beta, \hat{\mu}))] = \Pr[T \geq \alpha^*(\beta, \hat{\mu})] = \Pr[(\hat{\mu}, T) \in S(1, \beta)] = \Pr[Y \in S(\rho, \rho\beta)]$$

where  $T \in \mathbb{R}$ ,  $T \sim \mathcal{N}(0, 1)$  and  $V \in \mathbb{R}^{d+1}$ ,  $V \sim \mathcal{N}(0, I)$ .  $\square$

### D Results for an $\ell_\infty$ adversary

In Figures 1a and 1b, we see that the lower bound in the case of  $\ell_\infty$  adversaries is not very informative for checking if a robust classifier has good adversarial robustness since the bound is almost always 0, except at  $\beta = 0.5$ , in which any two samples can be reached from one another with zero adversarial cost, reducing the maximum possible classification accuracy to 0.5. This implies that in the  $\ell_\infty$  distance, these image datasets are very well separated even with an adversary and there exist good hypotheses  $h$ . For MNIST (till  $\beta = 0.4$ ) and Fashion MNIST ( $\beta = 0.3$ ), we find that iterative adversarial training is effective.

For the CIFAR-10 dataset 1c, non-zero adversarial robustness occurs after  $\beta = 0.2$ . However, current defense methods have only shown robust classification with  $\beta$  up to 0.1, where the lower bound is 0. In future work, we will explore the limits of  $\beta$  till which robust classification is possible with neural networks.

## References

- [1] Cédric Villani. *Optimal transport: old and new*, volume 338. Springer Science & Business Media, 2008.
